# Supplementary material for: Nasopharyngeal Carcinoma Subtype Discovery via Immune Cell Scores from Tumor Microenvironment
Source: Hindawi journal article supplement (doi:10.1155/2023/2242577), 2023-03-31

**A**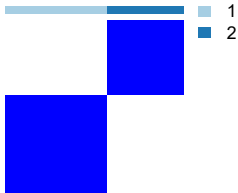**B**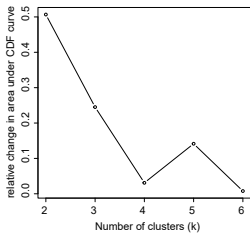**C**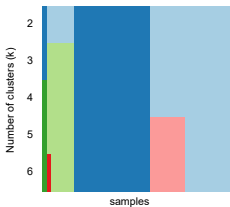**D**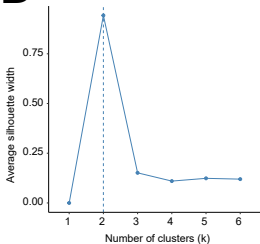

Supplement: f3 [file 2242577.f3.pdf]
