# Supplementary material for: Nasopharyngeal Carcinoma Subtype Discovery via Immune Cell Scores from Tumor Microenvironment
Source: Hindawi journal article supplement (doi:10.1155/2023/2242577), 2023-03-31
Supplement: f4 [file 2242577.f4.pdf]

S1

S2

ssgsea.Activated.B.cell  
 ssgsea.Activated.CD4.T.cell  
 ssgsea.Activated.CD8.T.cell  
 ssgsea.Activated.dendritic.cell  
 ssgsea.CD56bright.natural.killer.cell  
 ssgsea.Central.memory.CD4.T.cell  
 ssgsea.Central.memory.CD8.T.cell  
 ssgsea.Effector.memeory.CD4.T.cell  
 ssgsea.Effector.memeory.CD8.T.cell  
 ssgsea.Gamma.delta.T.cell  
 ssgsea.Immature..B.cell  
 ssgsea.Memory.B.cell  
 ssgsea.Natural.killer.cell  
 ssgsea.Natural.killer.T.cell  
 ssgsea.Type.1.T.helper.cell  
 ssgsea.Type.17.T.helper.cell  
 ssgsea.CD56dim.natural.killer.cell  
 ssgsea.Eosinophil  
 ssgsea.Immature.dendritic.cell  
 ssgsea.Macrophage  
 ssgsea.Mast.cell  
 ssgsea.MDSC  
 ssgsea.Monocyte  
 ssgsea.Neutrophil  
 ssgsea.Plasmacytoid.dendritic.cell  
 ssgsea.Regulatory.T.cell  
 ssgsea.T.follicular.helper.cell  
 ssgsea.Type.2.T.helper.cell  
 MCP.T.cells  
 MCP.CD8.T.cells  
 MCP.Cytotoxic.lymphocytes  
 MCP.B.lineage  
 MCP.NK.cells  
 MCP.Monocytic.lineage  
 MCP.Myeloid.dendritic.cells  
 MCP.Neutrophils  
 MCP.Endothelial.cells  
 MCP.Fibroblasts  
 estimate.StromalScore  
 estimate.ImmuneScore  
 estimate.ESTIMATEScore  
 estimate.TumorPurity
