# Supplementary material for: Nasopharyngeal Carcinoma Subtype Discovery via Immune Cell Scores from Tumor Microenvironment
Source: Hindawi journal article supplement (doi:10.1155/2023/2242577), 2023-03-31

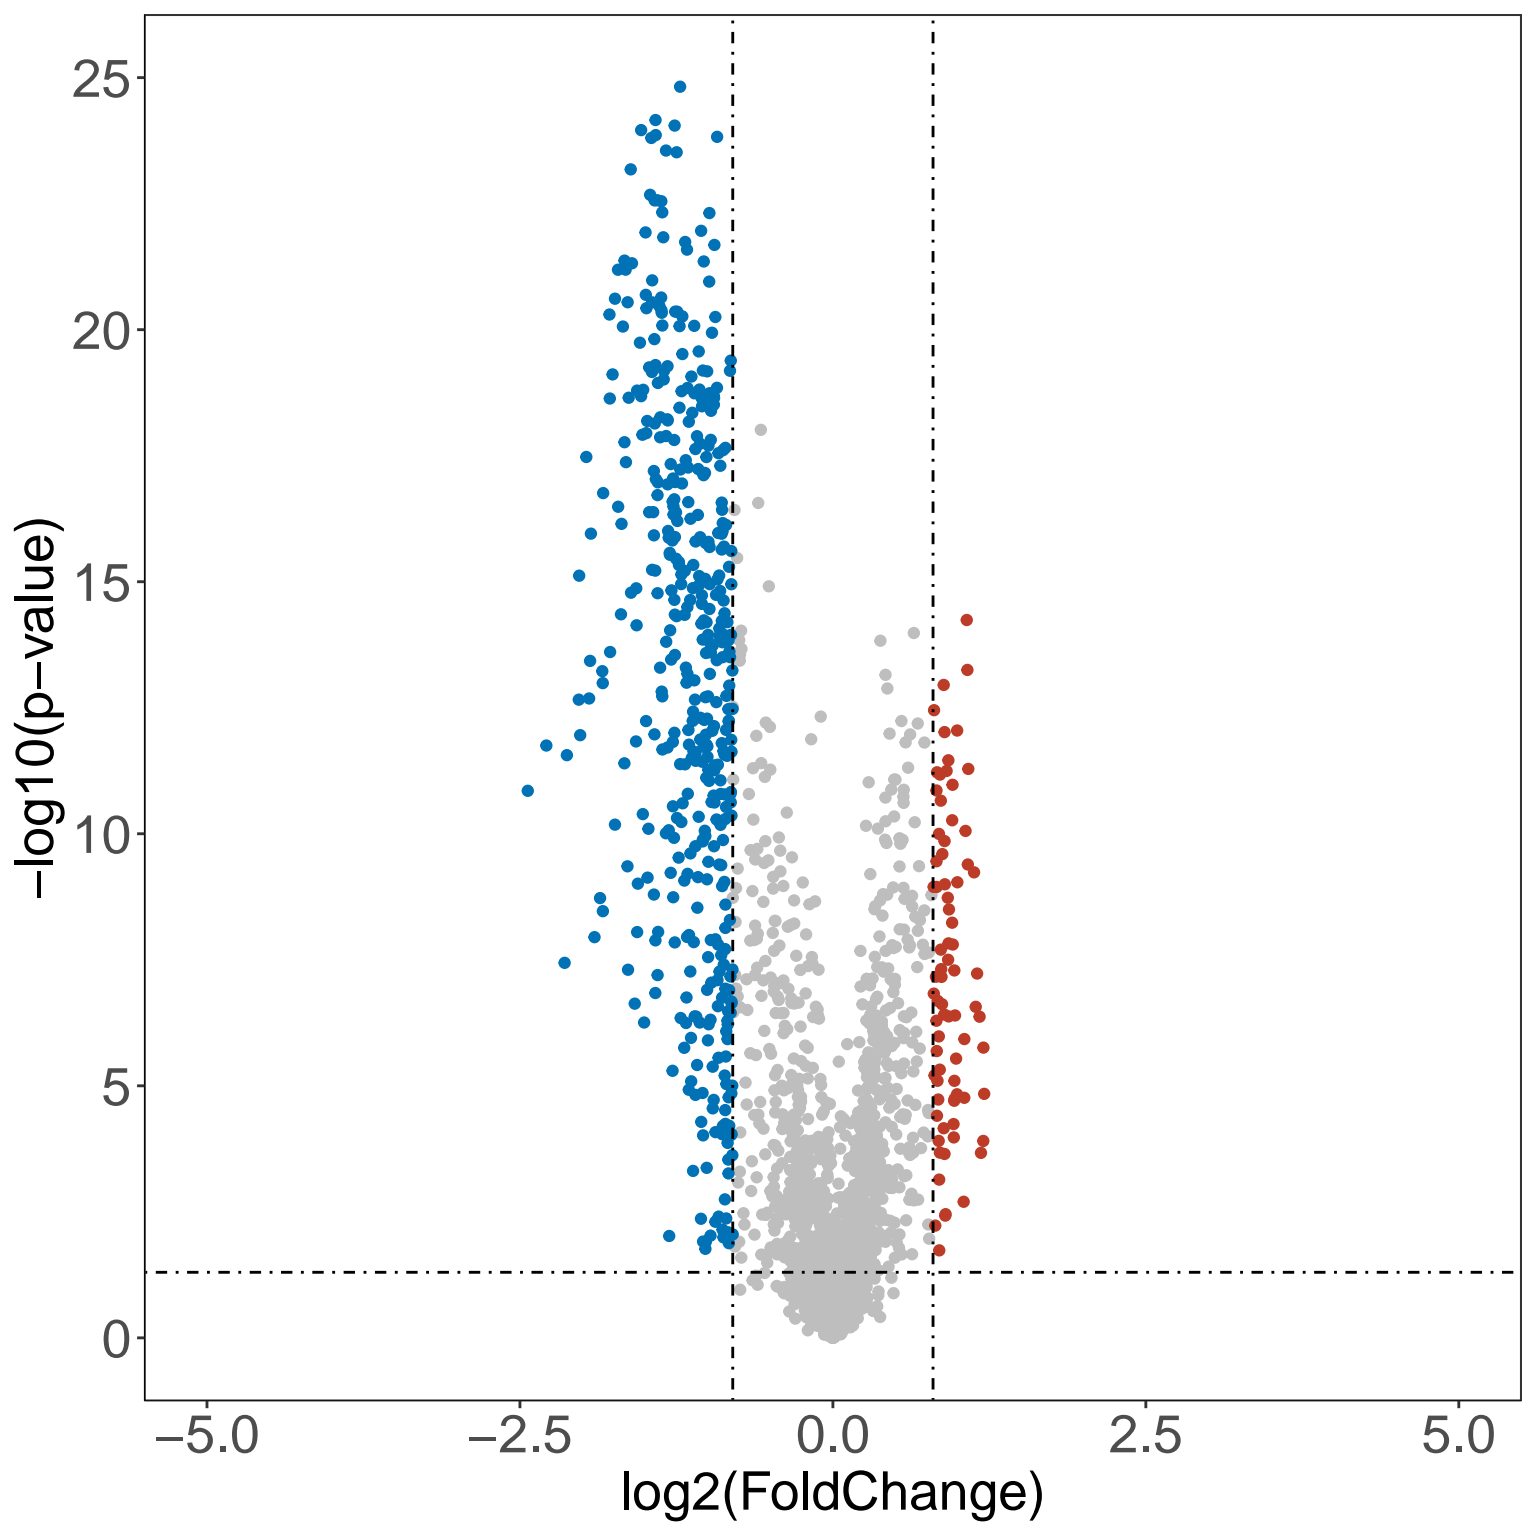

Supplement: f5 [file 2242577.f5.pdf]
