# Supplementary material for: Nasopharyngeal Carcinoma Subtype Discovery via Immune Cell Scores from Tumor Microenvironment
Source: Hindawi journal article supplement (doi:10.1155/2023/2242577), 2023-03-31
Supplement: f7 [file 2242577.f7.pdf]

# NPCSP: Nasopharyngeal Carcinoma Subtype Prediction

Manu

1. The Web Server for Predicting the Immune Subtype

2. The Introduction and Tutorial of Web Server

Step1. Provide the expression values of hub genes

LCK Expression

CD247 Expression

FYN Expression

ZAP70 Expression

SH2D1A Expression

CD3D Expression

CD3E Expression

CD3G Expression

Step2. Click the submit button

Submit

The current sample was predicted to be subtype1
